# Supplementary material for: Particulate Matter Exposure and Allergic Rhinitis: The Role of Plasmatic Extracellular Vesicles and Bacterial Nasal Microbiome
Source: MDPI journal article supplement (doi:10.3390/ijerph182010689), 2021-10-12
Supplement: s1 [file s1]

**Supplementary Table S1****MISEV 2018 guidelines compliance**

|    | Section title                                                     | Required information according to MISEV2018                                                                                                                         | Mandatory requirement | Not applicable/not available | Our approach                                                                                          | Compliance with MISEV2018 requirements |
|----|-------------------------------------------------------------------|---------------------------------------------------------------------------------------------------------------------------------------------------------------------|-----------------------|------------------------------|-------------------------------------------------------------------------------------------------------|----------------------------------------|
| 1  | Nomenclature                                                      | The term extracellular vesicle (EV) can be used with demonstration of extracellular (no intact cells) and vesicular nature per these characterizations and function | YES                   |                              | As explained in sections 4 and 5, the term extracellular vesicle (EV) has been used in the manuscript | YES                                    |
| 2a | Collection and pre-processing (tissue culture conditioned medium) | General cell characterization                                                                                                                                       | YES                   | N/A                          |                                                                                                       |                                        |
| 2a | Collection and pre-processing (tissue culture conditioned medium) | Medium used before and during collection (additives, serum, other)                                                                                                  | YES                   | N/A                          |                                                                                                       |                                        |
| 2a | Collection and pre-processing (tissue culture conditioned medium) | Exact protocol for the depletion of EVs from additives in collection medium                                                                                         | YES                   | N/A                          |                                                                                                       |                                        |

|           |                                                                   |                                                                                                                                                                                            |     |  |                                                                                                                                                 |     |
|-----------|-------------------------------------------------------------------|--------------------------------------------------------------------------------------------------------------------------------------------------------------------------------------------|-----|--|-------------------------------------------------------------------------------------------------------------------------------------------------|-----|
| 2a        | Collection and pre-processing (tissue culture conditioned medium) | Nature and size of culture vessels, and volume of the medium during conditioning<br>e) specific culture conditions (treatment, % O2, coating,polarization...) before and during collection | N/A |  |                                                                                                                                                 |     |
| 2a        | Collection and pre-processing (tissue culture conditioned medium) | Number of cells/ml and % of live/ dead cells at time of collection                                                                                                                         | N/A |  |                                                                                                                                                 |     |
| 2a        | Collection and pre-processing (tissue culture conditioned medium) | Frequency and interval of Conditioned Medium harvest                                                                                                                                       | N/A |  |                                                                                                                                                 |     |
| 2b and 2c | Collection and pre-processing (Biofluids or tissues)              | Donor status if available (age, sex, food/water intake, collection time, disease, medication, other)                                                                                       | YES |  | Each recruited subject filled in an informative questionnaire before blood drawing; blood samples were processed within 2 hrs after blood draws | YES |
| 2b and 2c | Collection and pre-processing (Biofluids or tissues)              | Volume of biofluid or volume/mass of tissue sample collected per donor                                                                                                                     | YES |  | For each subject, two blood samples were collected in two EDTA tubes (7 mL each)                                                                | YES |

|           |                                                      |                                                                                  |     |     |                                                                                                                                                                                                                                                                                                                     |     |
|-----------|------------------------------------------------------|----------------------------------------------------------------------------------|-----|-----|---------------------------------------------------------------------------------------------------------------------------------------------------------------------------------------------------------------------------------------------------------------------------------------------------------------------|-----|
| 2b and 2c | Collection and pre-processing (Biofluids or tissues) | Total volume/mass used for EV isolation (if pooled from several donors)          | YES |     | EVs isolation was performed starting from two aliquots of 3 mL of plasma for each subject. Each EV pellet aliquot obtained from each subject was resuspended in 1 mL of PBS triple filtered (pore size 0.1 $\mu\text{m}$ ).                                                                                         | YES |
| 2b and 2c | Collection and pre-processing (Biofluids or tissues) | All known collection conditions, including additives, at time of collection      |     |     | Blood samples were collected in 7 mL EDTA tubes                                                                                                                                                                                                                                                                     | YES |
| 2b and 2c | Collection and pre-processing (Biofluids or tissues) | Pre-treatment to separate major fluid-specific contaminants before EV isolation  |     |     | Blood was centrifuged at $1200 \times g$ for 15 min at room temperature to obtain platelet-free plasma. After that, two aliquots of 3 mL of plasma for each subject were subsequently centrifuged at 1000, 2000, and $3000 \times g$ for 15 min at 4 °C. The obtained pellets were discarded to remove cell debris. | YES |
| 2b and 2c | Collection and pre-processing (Biofluids or tissues) | Temperature and time of biofluid/tissue handling before and during pre-treatment |     |     | Each sample was processed within 2 hrs and maintained at 4 °C                                                                                                                                                                                                                                                       | YES |
| 2b and 2c | Collection and pre-processing (Biofluids or tissues) | For cultured tissue explants: volume, nature of                                  |     | N/A |                                                                                                                                                                                                                                                                                                                     |     |

|           |                                                             |                                                                                                                                                                                                                                   |     |     |                                                                                                                                                                                                                                                                                                                                                                   |     |
|-----------|-------------------------------------------------------------|-----------------------------------------------------------------------------------------------------------------------------------------------------------------------------------------------------------------------------------|-----|-----|-------------------------------------------------------------------------------------------------------------------------------------------------------------------------------------------------------------------------------------------------------------------------------------------------------------------------------------------------------------------|-----|
|           |                                                             | medium and time of culture<br>before collecting<br>conditioned<br><br>medium                                                                                                                                                      |     |     |                                                                                                                                                                                                                                                                                                                                                                   |     |
| 2b and 2c | Collection and pre-<br>processing (Biofluids<br>or tissues) | For direct tissue EV<br>extraction: treatment of<br>tissue<br><br>to release vesicles without<br>disrupting cells                                                                                                                 |     | N/A |                                                                                                                                                                                                                                                                                                                                                                   |     |
| 2d        | Storage and<br>recovery                                     | Storage and recovery (e.g.,<br>thawing) of CCM, biofluid,<br>or tissue before EV isolation<br>(storage temperature,<br>vessel, time; method of<br>thawing or other sample<br>preparation)                                         | N/A |     |                                                                                                                                                                                                                                                                                                                                                                   |     |
| 2d        | Storage and<br>recovery                                     | Storage and recovery of EVs<br>after isolation (temperature,<br>vessel, time, additive(s)...)                                                                                                                                     | YES |     | Isolated EVs were immediately<br>characterized by flow cytometry<br>and Nanosight.                                                                                                                                                                                                                                                                                | YES |
| 3         | EV separation and<br>concentration                          | Centrifugation: reference<br>number of tube(s), rotor(s),<br>adjusted k factor(s) of each<br>centrifugation step (= time+<br><br>speed+ rotor,<br>volume/density of<br>centrifugation conditions),<br>temperature, brake settings | YES |     | We applied differential<br>ultracentrifugation preceded by<br>lower-speed centrifugation steps. In<br>particular, 7 mL of whole blood<br>were collected in Corning 15 mL PP<br>Centrifuge Tubes and centrifuged at<br>1000, 2000, and 3000 × g for 15 min<br>at 4 °C (Haereus Labofuge 400R,<br>Hanau, Germany). The obtained<br>pellets were discarded to remove | YES |

|   |                                 |                                                                                                                                                                                                  |  |     |                                                                                                                                                                                                                                                                                                                                                                                                                                                                                                                                                                                                                        |  |
|---|---------------------------------|--------------------------------------------------------------------------------------------------------------------------------------------------------------------------------------------------|--|-----|------------------------------------------------------------------------------------------------------------------------------------------------------------------------------------------------------------------------------------------------------------------------------------------------------------------------------------------------------------------------------------------------------------------------------------------------------------------------------------------------------------------------------------------------------------------------------------------------------------------------|--|
|   |                                 |                                                                                                                                                                                                  |  |     | <p>cells, apoptotic bodies, and cell debris. EVs were then isolated from supernatants by ultracentrifugation at <math>110,000 \times g</math> for 94 min at 4 °C in polypropylene ultracentrifuge tubes (Quick-Seal ultra-clear centrifuge tubes, Beckman Coulter; Brea, CA, USA) rotor MLA-55 (Beckman Coulter), filled with PBS previously filtered through a 0.10-<math>\mu m</math> pore-size polyethersulfone filter (StericupRVP, Merck Millipore; Burlington, MA, USA). Our method is included in the category “Intermediate recovery, intermediate specificity = mixed EVs with limited non-EV components”</p> |  |
| 3 | EV separation and concentration | Density gradient: nature of matrix, method of generating gradient, reference (and size) of tubes, centrifugation speed and time (with brake specified), method, and volume of fraction recovery. |  | N/A |                                                                                                                                                                                                                                                                                                                                                                                                                                                                                                                                                                                                                        |  |
| 3 | EV separation and concentration | Chromatography: matrix (nature, pore size,...), loaded sample volume, fraction volume, number                                                                                                    |  | N/A |                                                                                                                                                                                                                                                                                                                                                                                                                                                                                                                                                                                                                        |  |

|   |                                 |                                                                                                                                                                |  |     |  |  |
|---|---------------------------------|----------------------------------------------------------------------------------------------------------------------------------------------------------------|--|-----|--|--|
| 3 | EV separation and concentration | Precipitation: reference of polymer, ratio vol/vol or weight/vol polymer/fluid, time/temperature of incubation, time/speed/temperature of centrifugation       |  | N/A |  |  |
| 3 | EV separation and concentration | Filtration: reference of filter type (=nature of the membrane, pore size...), time and speed of centrifugation, volume before/after (in case of concentration) |  | N/A |  |  |
| 3 | EV separation and concentration | Antibody-based characterization: reference of antibodies, mass Ab/amount of EVs, nature of Ab carrier (bead, surface), and amount of Ab/carrier surface        |  | N/A |  |  |
| 3 | EV separation and concentration | Other: all necessary details to allow replication                                                                                                              |  | N/A |  |  |
| 3 | EV separation and concentration | Additional step(s) to concentrate, if any                                                                                                                      |  | N/A |  |  |
| 3 | EV separation and concentration | Additional step(s) to wash matrix and/or sample, if any                                                                                                        |  | N/A |  |  |

|    |                                     |                                                                                                                                                                               |     |  |                                                                                                                                                                                                                                                                                                                                                                                                                                                                                                                                                                                                                                                                                                                                                                                                                                                                                                                          |     |
|----|-------------------------------------|-------------------------------------------------------------------------------------------------------------------------------------------------------------------------------|-----|--|--------------------------------------------------------------------------------------------------------------------------------------------------------------------------------------------------------------------------------------------------------------------------------------------------------------------------------------------------------------------------------------------------------------------------------------------------------------------------------------------------------------------------------------------------------------------------------------------------------------------------------------------------------------------------------------------------------------------------------------------------------------------------------------------------------------------------------------------------------------------------------------------------------------------------|-----|
| 4a | EV characterization, Quantification | Volume of fluid, and/or cell number, and/or tissue mass used to isolate EVs                                                                                                   | N/A |  |                                                                                                                                                                                                                                                                                                                                                                                                                                                                                                                                                                                                                                                                                                                                                                                                                                                                                                                          |     |
| 4a | EV characterization, Quantification | Global quantification by at least 2 methods: protein amount, particle number, lipid amount, expressed per volume of initial fluid or number of producing cells/mass of tissue | YES |  | <p>To quantify the total number of EVs we applied the two following approaches:</p> <p>1) Nanoparticle tracking analysis by NanoSight NS300 system (Malvern Panalytical Ltd, Malvern, UK). Five 30-s recordings were made for each sample. Collected data were analyzed with NTA software (Malvern Panalytical Ltd.), which provided high-resolution particle-size distribution profiles as well as measurements of the EV concentration.</p> <p>2) High-resolution Flow cytometry by MACSQuant, Miltenyi Biotec. To analyze EV integrity, 60 µl aliquots were stained with 0.2 µM 5(6)-carboxyfluorescein diacetate N-succinimidyl ester (CFSE) at 37 °C for 20 min in the dark. CFSE is a cell-permeant, non-fluorescent pro-dye. If incorporated into intact EVs, which contain esterases as live cells, the acetate groups of CFSE are cleaved producing a membrane-impermeant molecule with green fluorescence.</p> | YES |

|    |                                               |                                                                                                                                                                                              |     |     |                                                                                                                                                                                                                                                                                                                                                                                                                                                                                                                                                                                                                                                                                                                                                                                                                                                                                                                                                          |     |
|----|-----------------------------------------------|----------------------------------------------------------------------------------------------------------------------------------------------------------------------------------------------|-----|-----|----------------------------------------------------------------------------------------------------------------------------------------------------------------------------------------------------------------------------------------------------------------------------------------------------------------------------------------------------------------------------------------------------------------------------------------------------------------------------------------------------------------------------------------------------------------------------------------------------------------------------------------------------------------------------------------------------------------------------------------------------------------------------------------------------------------------------------------------------------------------------------------------------------------------------------------------------------|-----|
| 4a | EV characterization, Quantification           | Ratio of the 2 quantification figures                                                                                                                                                        | YES | N/A |                                                                                                                                                                                                                                                                                                                                                                                                                                                                                                                                                                                                                                                                                                                                                                                                                                                                                                                                                          |     |
| 4b | EV characterization, General Characterization | <p>At least <u>three</u> positive protein markers of EVs, including at least one transmembrane/lipid-bound protein and one cytosolic protein</p> <p>At least one negative protein marker</p> | YES |     | <p>The following antibodies have been used to measure positive protein markers of plasmatic EVs:</p> <p>AbCD177-APC (neutrophils, clone REA 598; Miltenyi Biotec), AbCD14-APC (monocytes, clone TUK4, Miltenyi Biotec), AbCD61-APC (platelets, clone Y2/51, Miltenyi Biotec), CD326 (EpCAM)-APC (epithelium, clone HEA-125, Miltenyi Biotec), AbCD62E-APC (activated epithelium, clone REA280, Miltenyi Biotec), AbCD203C (mast cells, clone REA 826, Miltenyi Biotec), AbCD294 (eosinophils, clone REA 598, Miltenyi Biotec); Ab-Lipopolysaccharide (LPS) (Invitrogen, Waltham, MA, USA), unconjugated anti-Lipoteichoic acid (Invitrogen), secondary IgG-antimouse (IgG (H+L), Superclonal™ Recombinant Secondary Antibody, Alexa Fluor 647- Invitrogen).</p> <p><u>Transmembrane, tissue-specific, and focus of the present study.</u></p> <p>CFSE staining was used to assess cytosolic esterase activity. As a negative control, representative</p> | YES |



|    |                            |                                                                                                                                                                                                                                    |     |  |                                                                                                                                                                                                                              |     |
|----|----------------------------|------------------------------------------------------------------------------------------------------------------------------------------------------------------------------------------------------------------------------------|-----|--|------------------------------------------------------------------------------------------------------------------------------------------------------------------------------------------------------------------------------|-----|
|    |                            |                                                                                                                                                                                                                                    |     |  | EVs samples were incubated with Tween20 (P1379; Merk, Sigma-Aldrich) ON at 37 °C, and then incubated with CFSE as described above. Positivity for CFSE fluorescence was evaluated by High-Resolution Flow cytometry analysis |     |
| 4c | Single EV characterization | Images of single EVs by electron microscopy                                                                                                                                                                                        | YES |  | Transmission Electron Microscopy (TEM) analysis was performed on random samples as quality control.                                                                                                                          | YES |
| 4c | Single EV characterization | Non-image-based method analyzing large numbers of single EVs: Non-image-based method analyzing large numbers of single EVs: NTA, TRPS, FCS, high-resolution flow cytometry, multi-angle light-scattering, Raman spectroscopy, etc. | YES |  | NTA and Flow Cytometry were performed                                                                                                                                                                                        | YES |
| 5  | Functional studies         | Dose-response assessment                                                                                                                                                                                                           | N/A |  |                                                                                                                                                                                                                              |     |
| 5  | Functional studies         | Negative control = nonconditioned medium, biofluid/tissue from control donors, as applicable                                                                                                                                       | N/A |  |                                                                                                                                                                                                                              |     |
| 5  | Functional studies         | Quantitative comparison of functional activity of total fluid, vs EV-depleted fluid,                                                                                                                                               | N/A |  |                                                                                                                                                                                                                              |     |

|   |                    |                                                                                                                             |     |     |  |  |
|---|--------------------|-----------------------------------------------------------------------------------------------------------------------------|-----|-----|--|--|
|   |                    | vs EVs (after high recovery/low specificity separation)                                                                     |     |     |  |  |
| 5 | Functional studies | Quantitative comparison of functional activity of EVs vs other EPs/fractions after low recovery/high specificity separation | N/A |     |  |  |
| 5 | Functional studies | Quantitative comparison of the activity of EV subtypes (if subtype-specific function claimed)                               | N/A |     |  |  |
| 5 | Functional studies | The extent of functional activity in the absence of contact between EV donor and EV recipient                               | N/A |     |  |  |
| 6 | Reporting          | Submission of data (proteomics, sequencing, other) to relevant public, curated databases or open-access repository          | YES | N/A |  |  |

**Supplementary Table S2. Genera description for Factor Analysis.** Description of the 81 genera, frequencies of non-zero relative abundance, and reason for the exclusion of 61 genera from the factor analysis.

| Genera                          | Mean $\pm$ SD    | Median<br>[Q1; Q3] | Number of<br>subjects<br>with non-<br>zero<br>relative<br>abundance<br>(n/%) | Reason for exclusion<br>from FA         |
|---------------------------------|------------------|--------------------|------------------------------------------------------------------------------|-----------------------------------------|
| <i>Prevotella</i>               | 0.19 $\pm$ 0.78  | 0.01 [0; 0.05]     | 29 (65)                                                                      | “unassigned”, and “other”               |
| <i>Abiotrophia</i>              | 0.09 $\pm$ 0.3   | 0 [0; 0.03]        | 20 (46)                                                                      |                                         |
| <i>Acinetobacter</i>            | 0.45 $\pm$ 0.81  | 0.15 [0.04; 0.48]  | 43 (96)                                                                      |                                         |
| <i>Actinobacillus</i>           | 0.04 $\pm$ 0.09  | 0 [0; 0.03]        | 18 (41)                                                                      | Mean $\leq$ 0.04 and median $\leq$ 0.03 |
| <i>Actinomyces</i>              | 0.25 $\pm$ 0.77  | 0.03 [0.01; 0.12]  | 38 (85)                                                                      |                                         |
| <i>Aerococcus</i>               | 0.02 $\pm$ 0.06  | 0 [0; 0]           | 13 (30)                                                                      | Mean $\leq$ 0.04 and median $\leq$ 0.03 |
| <i>Aggregatibacter</i>          | 0.1 $\pm$ 0.31   | 0 [0; 0.02]        | 25 (57)                                                                      | Communalities < 0.15                    |
| <i>Alloiococcus</i>             | 6.18 $\pm$ 12.38 | 0.39 [0.04; 6.67]  | 45 (100)                                                                     | KMO < 0.30                              |
| <i>Anaerococcus</i>             | 1.79 $\pm$ 1.93  | 1.29 [0.52; 2.78]  | 45 (100)                                                                     |                                         |
| <i>Bifidobacterium</i>          | 0.03 $\pm$ 0.2   | 0 [0; 0]           | 0 (2)                                                                        | Mean $\leq$ 0.04 and median $\leq$ 0.03 |
| <i>Brachybacterium</i>          | 0.02 $\pm$ 0.04  | 0 [0; 0.01]        | 18 (41)                                                                      | Mean $\leq$ 0.04 and median $\leq$ 0.03 |
| <i>Brevibacterium</i>           | 0.05 $\pm$ 0.14  | 0 [0; 0.02]        | 18 (41)                                                                      | KMO < 0.30                              |
| <i>Brochothrix</i>              | 0.17 $\pm$ 1     | 0 [0; 0.01]        | 13 (30)                                                                      | KMO < 0.30                              |
| <i>Bulleidia</i>                | 0.05 $\pm$ 0.21  | 0 [0; 0]           | 6 (15)                                                                       | No correlation                          |
| <i>Campylobacter</i>            | 0.06 $\pm$ 0.14  | 0 [0; 0.03]        | 23 (52)                                                                      | KMO < 0.30                              |
| <i>Capnocytophaga</i>           | 0.06 $\pm$ 0.15  | 0 [0; 0.02]        | 22 (50)                                                                      |                                         |
| <i>Cardiobacterium</i>          | 0.01 $\pm$ 0.05  | 0 [0; 0.01]        | 12 (28)                                                                      | Mean $\leq$ 0.04 and median $\leq$ 0.03 |
| <i>Carnobacterium</i>           | 0.03 $\pm$ 0.08  | 0 [0; 0.02]        | 22 (50)                                                                      | Mean $\leq$ 0.04 and median $\leq$ 0.03 |
| <i>Chryseobacterium</i>         | 0.05 $\pm$ 0.14  | 0 [0; 0.02]        | 19 (43)                                                                      | KMO < 0.30                              |
| <i>Citrobacter</i>              | 0.06 $\pm$ 0.17  | 0 [0; 0.02]        | 20 (46)                                                                      |                                         |
| <i>Cloacibacterium</i>          | 0.03 $\pm$ 0.07  | 0 [0; 0.02]        | 22 (50)                                                                      | Mean $\leq$ 0.04 and median $\leq$ 0.03 |
| <i>Corynebacterium</i>          | 36.1 $\pm$ 24.1  | 29.9 [18.6; 51.6]  | 45 (100)                                                                     | KMO < 0.30                              |
| <i>Deinococcus</i>              | 0.02 $\pm$ 0.08  | 0 [0; 0]           | 2 (7)                                                                        | Mean $\leq$ 0.04 and median $\leq$ 0.03 |
| <i>Delftia</i>                  | 0.03 $\pm$ 0.04  | 0 [0; 0.03]        | 24 (54)                                                                      | Mean $\leq$ 0.04 and median $\leq$ 0.03 |
| <i>Dialister</i>                | 0.15 $\pm$ 0.51  | 0 [0; 0.03]        | 23 (52)                                                                      |                                         |
| <i>Enhydrobacter</i>            | 0.27 $\pm$ 0.48  | 0.13 [0.02; 0.3]   | 41 (91)                                                                      | KMO < 0.30                              |
| <i>Escherichia</i>              | 0.08 $\pm$ 0.16  | 0.01 [0; 0.06]     | 33 (74)                                                                      | KMO < 0.30                              |
| <i>Fingoldia</i>                | 0.58 $\pm$ 0.98  | 0.14 [0.01; 0.66]  | 40 (89)                                                                      | KMO < 0.30                              |
| <i>Fusobacterium</i>            | 0.16 $\pm$ 0.3   | 0.04 [0; 0.11]     | 37 (83)                                                                      |                                         |
| <i>Gordonia</i>                 | 0.07 $\pm$ 0.37  | 0 [0; 0.01]        | 16 (37)                                                                      | KMO < 0.30                              |
| <i>Granulicatella</i>           | 0.18 $\pm$ 0.54  | 0.02 [0; 0.15]     | 37 (83)                                                                      |                                         |
| <i>Haemophilus</i>              | 0.19 $\pm$ 0.28  | 0.07 [0.01; 0.24]  | 42 (93)                                                                      | KMO < 0.30                              |
| <i>Janthinobacterium</i>        | 0.14 $\pm$ 0.66  | 0.01 [0; 0.05]     | 33 (74)                                                                      | Communalities < 0.15                    |
| <i>Kingella</i>                 | 0.02 $\pm$ 0.06  | 0 [0; 0]           | 15 (35)                                                                      | Mean $\leq$ 0.04 and median $\leq$ 0.03 |
| <i>Kocuria</i>                  | 0.24 $\pm$ 0.39  | 0.1 [0.01; 0.26]   | 39 (87)                                                                      | KMO < 0.30                              |
| <i>Lactobacillus</i>            | 0.06 $\pm$ 0.28  | 0 [0; 0]           | 16 (37)                                                                      | Communalities < 0.15                    |
| <i>Lautropia</i>                | 0.03 $\pm$ 0.08  | 0 [0; 0.03]        | 23 (52)                                                                      | Mean $\leq$ 0.04 and median $\leq$ 0.03 |
| <i>Leptotrichia</i>             | 0.09 $\pm$ 0.37  | 0 [0; 0.02]        | 22 (50)                                                                      |                                         |
| <i>Methylobacterium</i>         | 0.02 $\pm$ 0.06  | 0 [0; 0.01]        | 16 (37)                                                                      | Mean $\leq$ 0.04 and median $\leq$ 0.03 |
| <i>Microbacterium</i>           | 0.03 $\pm$ 0.06  | 0.01 [0; 0.04]     | 32 (72)                                                                      | Mean $\leq$ 0.04 and median $\leq$ 0.03 |
| <i>Microbispora</i>             | 0.37 $\pm$ 2.44  | 0 [0; 0]           | 16 (37)                                                                      | KMO < 0.30                              |
| <i>Micrococcus</i>              | 0.21 $\pm$ 0.3   | 0.09 [0.02; 0.26]  | 42 (93)                                                                      | Communalities < 0.15                    |
| <i>Modestobacter</i>            | 0.03 $\pm$ 0.12  | 0 [0; 0.01]        | 14 (33)                                                                      | Mean $\leq$ 0.04 and median $\leq$ 0.03 |
| <i>Moraxella</i>                | 9.86 $\pm$ 24.06 | 0.08 [0.02; 0.28]  | 44 (98)                                                                      | KMO < 0.30                              |
| <i>Neisseria</i>                | 0.52 $\pm$ 1.69  | 0.04 [0.01; 0.27]  | 43 (96)                                                                      | KMO < 0.30                              |
| <i>Other_Enterobacteriaceae</i> | 0.37 $\pm$ 0.87  | 0.04 [0.01; 0.17]  | 39 (87)                                                                      | “unassigned”, and “other”               |

|                                       |               |                     |          |                               |
|---------------------------------------|---------------|---------------------|----------|-------------------------------|
| <i>Other_Microbacteriaceae</i>        | 0.01 ± 0.02   | 0 [0; 0.01]         | 23 (52)  | "unassigned", and "other"     |
| <i>Other_Pseudomonadaceae</i>         | 0.02 ± 0.06   | 0 [0; 0.02]         | 23 (52)  | "unassigned", and "other"     |
| <i>Paludibacter</i>                   | 0.01 ± 0.07   | 0 [0; 0]            | 4 (11)   | Mean ≤ 0.04 and median ≤ 0.03 |
| <i>Paracoccus</i>                     | 0.37 ± 0.7    | 0.11 [0.02; 0.39]   | 40 (89)  | KMO < 0.30                    |
| <i>Parvimonas</i>                     | 0.04 ± 0.23   | 0 [0; 0.01]         | 13 (30)  | Communalities < 0.15          |
| <i>Peptoniphilus</i>                  | 1.45 ± 1.95   | 0.7 [0.07; 2.59]    | 45 (100) |                               |
| <i>Phycococcus</i>                    | 0.04 ± 0.08   | 0 [0; 0.03]         | 28 (63)  | Mean ≤ 0.04 and median ≤ 0.03 |
| <i>Porphyromonas</i>                  | 0.06 ± 0.14   | 0.01 [0; 0.05]      | 29 (65)  |                               |
| <i>Prevotella</i>                     | 0.2 ± 0.47    | 0.02 [0; 0.2]       | 33 (74)  |                               |
| <i>Propionibacterium</i>              | 7.54 ± 7.94   | 5.27 [2.36; 9.16]   | 45 (100) |                               |
| <i>Pseudomonas</i>                    | 1.28 ± 2.35   | 0.29 [0.03; 1.34]   | 45 (100) |                               |
| <i>Psychrobacter</i>                  | 0.02 ± 0.12   | 0 [0; 0]            | 3 (9)    | Mean ≤ 0.04 and median ≤ 0.03 |
| <i>Psychromonas</i>                   | 0.17 ± 0.97   | 0 [0; 0]            | 2 (7)    | No correlation                |
| <i>Roseomonas</i>                     | 0.01 ± 0.04   | 0 [0; 0.01]         | 13 (30)  | Mean ≤ 0.04 and median ≤ 0.03 |
| <i>Rothia</i>                         | 0.52 ± 1.78   | 0.09 [0.03; 0.45]   | 40 (89)  |                               |
| <i>Rubellimicrobium</i>               | 0.02 ± 0.07   | 0 [0; 0]            | 13 (30)  | Mean ≤ 0.04 and median ≤ 0.03 |
| <i>Selenomonas</i>                    | 0.04 ± 0.18   | 0 [0; 0]            | 12 (28)  | Mean ≤ 0.04 and median ≤ 0.03 |
| <i>Serratia</i>                       | 0.02 ± 0.1    | 0 [0; 0]            | 3 (9)    | No correlation                |
| <i>Sphingomonas</i>                   | 0.06 ± 0.11   | 0.02 [0; 0.06]      | 33 (74)  | KMO < 0.30                    |
| <i>Staphylococcus</i>                 | 18.79 ± 16.93 | 12.26 [6.41; 30.41] | 45 (100) |                               |
| <i>Stenotrophomonas</i>               | 0.02 ± 0.03   | 0 [0; 0.04]         | 25 (57)  | Mean ≤ 0.04 and median ≤ 0.03 |
| <i>Streptococcus</i>                  | 3.31 ± 6.95   | 0.7 [0.25; 2.46]    | 45 (100) |                               |
| <i>Unassigned_Weeksellaceae_</i>      | 0.03 ± 0.09   | 0 [0; 0]            | 12 (28)  | "unassigned", and "other"     |
| <i>Unassigned_Caulobacteraceae</i>    | 0.01 ± 0.03   | 0 [0; 0.01]         | 18 (41)  | "unassigned", and "other"     |
| <i>Unassigned_Clostridiaceae</i>      | 0.02 ± 0.04   | 0 [0; 0]            | 12 (28)  | "unassigned", and "other"     |
| <i>Unassigned_Clostridiales</i>       | 0.01 ± 0.03   | 0 [0; 0]            | 6 (15)   | "unassigned", and "other"     |
| <i>Unassigned_CW040</i>               | 0.03 ± 0.2    | 0 [0; 0]            | 4 (11)   | "unassigned", and "other"     |
| <i>Unassigned_Gemellaceae</i>         | 0.27 ± 0.59   | 0.07 [0.02; 0.19]   | 40 (89)  | "unassigned", and "other"     |
| <i>Unassigned_Geodermatophilaceae</i> | 0.02 ± 0.06   | 0 [0; 0.01]         | 18 (41)  | "unassigned", and "other"     |
| <i>Unassigned_Micrococcaceae</i>      | 0.09 ± 0.23   | 0.01 [0; 0.05]      | 37 (83)  | "unassigned", and "other"     |
| <i>Unassigned_Neisseriaceae</i>       | 5.3 ± 11.74   | 0.24 [0.03; 3.92]   | 44 (98)  | "unassigned", and "other"     |
| <i>Unassigned_Streptophyta</i>        | 0.36 ± 0.44   | 0.2 [0.08; 0.49]    | 43 (96)  | "unassigned", and "other"     |
| <i>Unassigned_TM7_3</i>               | 0.08 ± 0.35   | 0 [0; 0.01]         | 14 (33)  | "unassigned", and "other"     |
| <i>Unassigned_Xenococcaceae</i>       | 0.02 ± 0.06   | 0 [0; 0]            | 7 (17)   | "unassigned", and "other"     |
| <i>Veillonella</i>                    | 0.2 ± 0.53    | 0.05 [0; 0.19]      | 33 (74)  |                               |

SD, standard deviation; Q1, first quartile; Q3 third quartile; KMO: Kaiser-Meyer-Olkin Statistic

**Supplementary table S3. Factorability of the correlation matrix of the original variables: individual and overall measures of sampling adequacy and Bartlett's test of sphericity**

|                                                                             |                   |
|-----------------------------------------------------------------------------|-------------------|
| <b>Bartlett's test of sphericity:</b>                                       | p-value <0.0001   |
| <b>Kaiser-Meyer-Olkin statistic - Overall measure of sampling adequacy:</b> | 0.62              |
| <b>Individual measures of sampling adequacy:</b>                            |                   |
| 0.40 - 0.50                                                                 | Capnocytophaga    |
|                                                                             | Prevotella        |
|                                                                             | Rothia            |
|                                                                             | Leptotrichia      |
| 0.50 - 0.60                                                                 | Abiotrophia       |
|                                                                             | Citrobacter       |
|                                                                             | Granulicatella    |
|                                                                             | Streptococcus     |
|                                                                             | Actinomyces       |
|                                                                             | Pseudomonas       |
| 0.60 - 0.70                                                                 | Fusobacterium     |
|                                                                             | Peptoniphilus     |
|                                                                             | Anaerococcus      |
|                                                                             | Porphyromonas     |
|                                                                             | Dialister         |
| 0.70 - 0.80                                                                 | Acinetobacter     |
|                                                                             | Veillonella       |
|                                                                             | Propionibacterium |
| ≥ 0.80                                                                      | Staphylococcus    |

Overall and individual measure of sampling adequacy range between 0 and 1, with values >0.50 indicating an acceptable size

**Supplementary Figure S1: LTA+ (gram-positive) EVs gating protocols for plasmatic EVs.** A-C negative control with PBS; D-F Plasma samples. A, D): scatter plots; B, E): dot plots with gating for CFSE fluorescence; C, F): dot plots for experimental sample (scatter+ CFSE + ANTI-GRAM+ antibody); D: dot plots for scatter+ ANTI-GRAM+ antibody

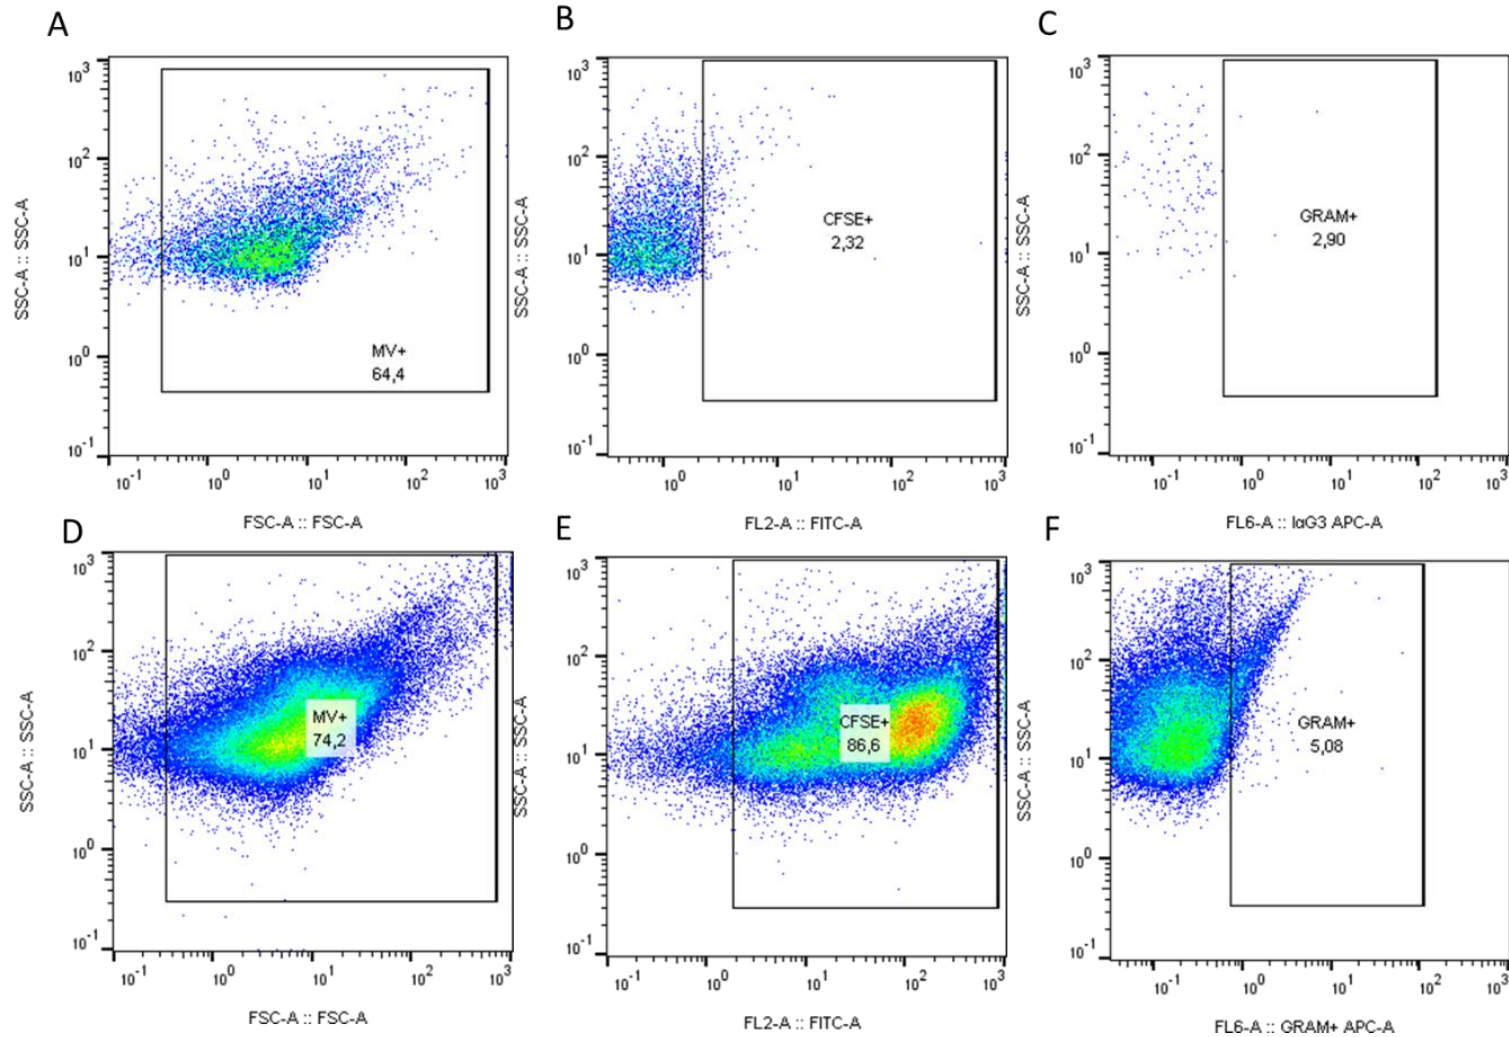

**Supplementary Figure S2: LPS+ (GRAM-negative) EVs gating protocols for plasmatic EVs.** A-C negative control with PBS; D-F Plasma samples. A, D): scatter plots; B, E): dot plots with gating for CFSE fluorescence; C, F): dot plots for experimental sample (scatter+ CFSE + ANTI-GRAM- antibody); D: dot plots for scatter+ ANTI-GRAM- antibody

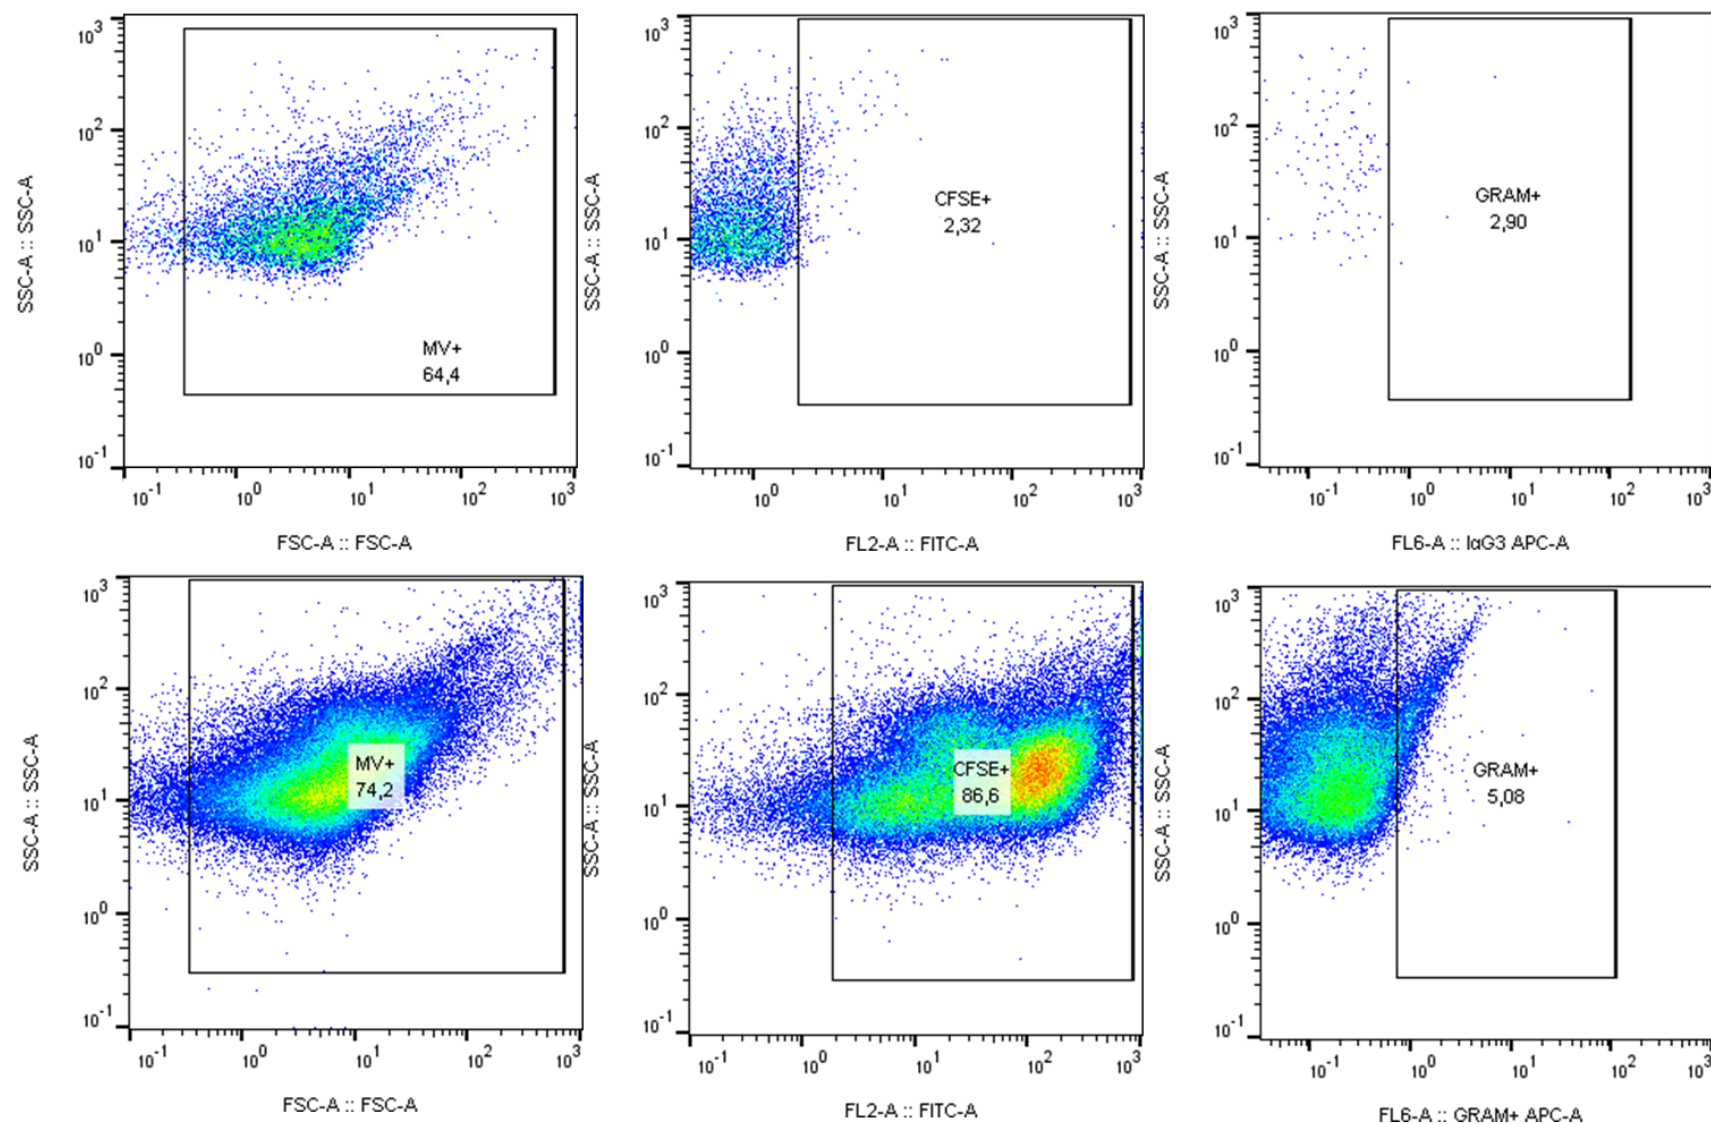

**Supplementary Figure S3: CD294+ EVs gating protocols for plasmatic EVs.** A-C negative control with PBS; D-F Plasma samples. A, D): scatter plots; B, E): dot plots with gating for CFSE fluorescence; C, F): dot plots for experimental sample (scatter+ CFSE + ANTI- CD294+ antibody); D: dot plots for scatter+ ANTI- CD294+ antibody

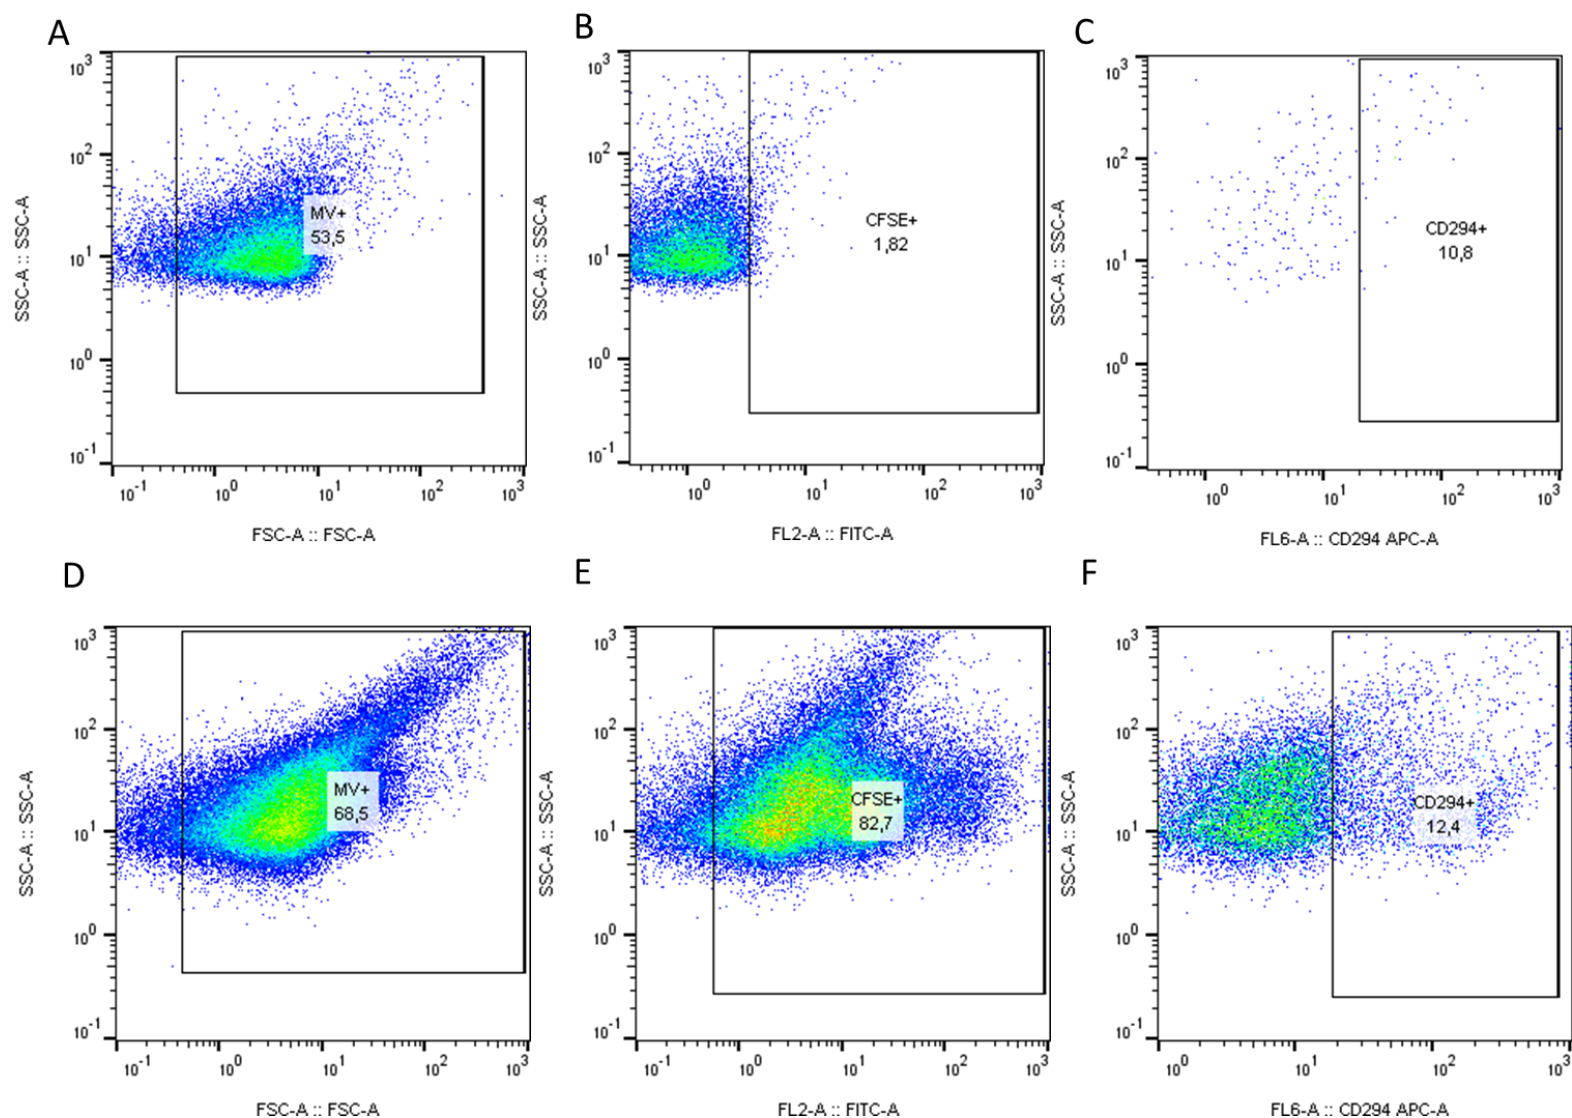



**Supplementary Figure S4: CD203+ EVs gating protocols for plasmatic EVs.** A-C negative control with PBS; D-F Plasma samples. A, D): scatter plots; B, E): dot plots with gating for CFSE fluorescence; C, F): dot plots for experimental sample (scatter+ CFSE + ANTI- CD03+ antibody); D: dot plots for scatter+ ANTI- CD203+ antibody

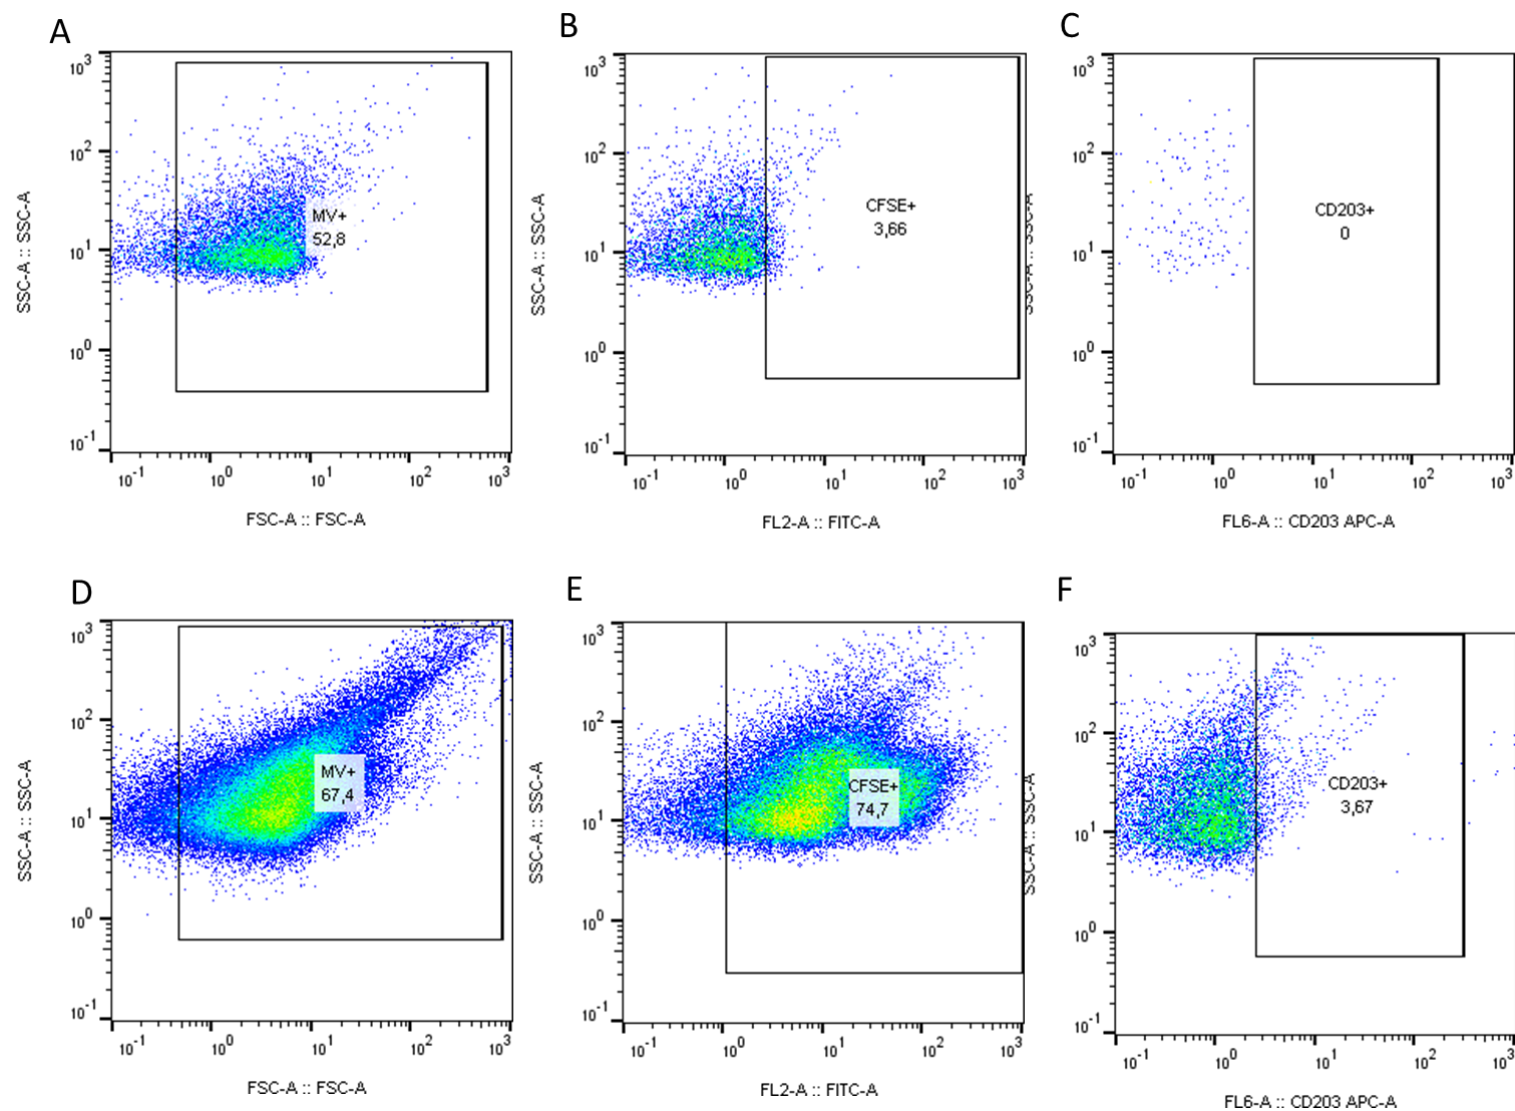

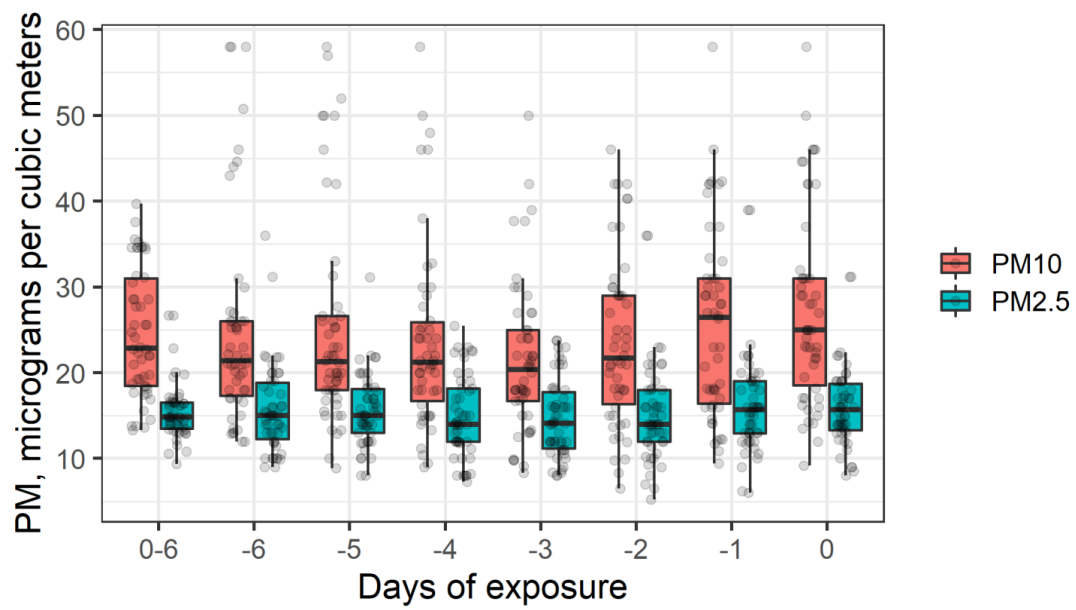

**Supplementary Figure S5. PM10 and PM2.5 Daily exposure levels from day 0 to day -6 and mean levels (day 0-6).**

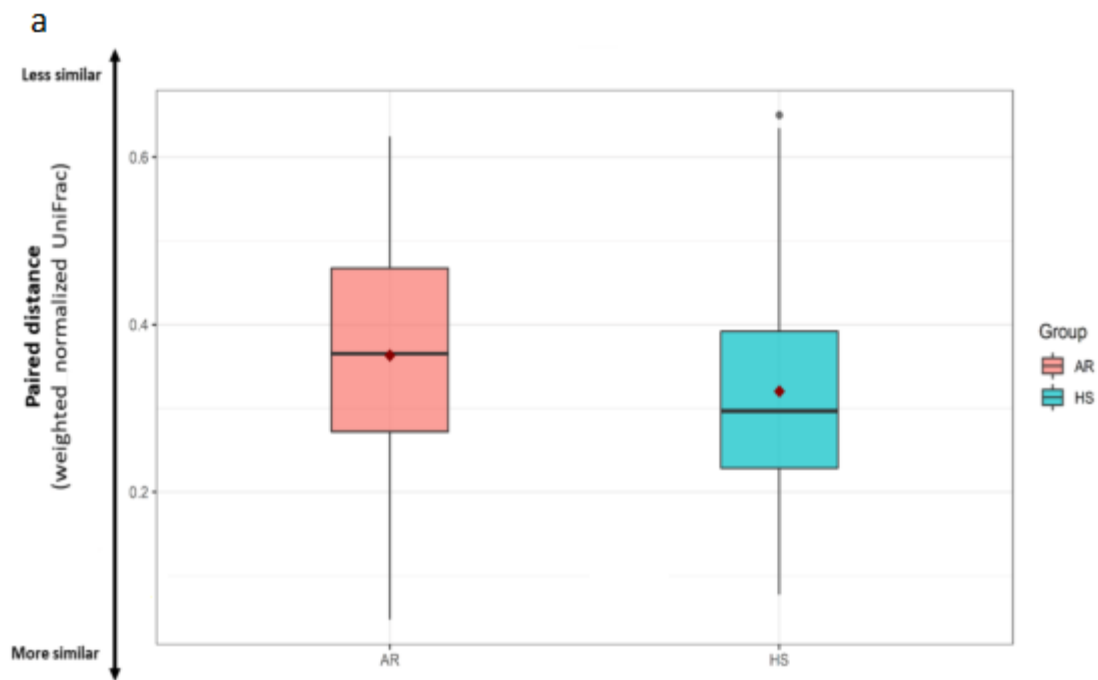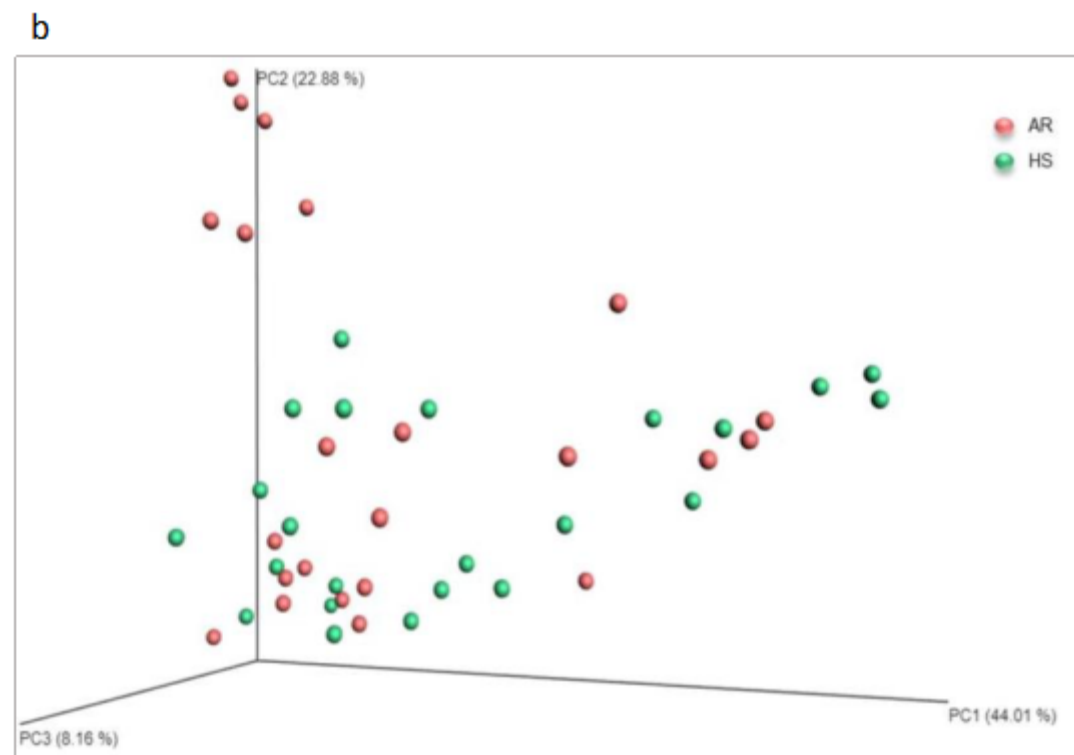

**Supplementary Figure S6. bNM diversity.** a) Intra-subject paired distance of the AR and HS group; b) Principal coordinate analyses (PCoA) plot made using the normalized Weighted UniFrac distance metric, each dot corresponds to a single subject belonging either to AR (red dot) or HS (green dot) groups, the variance explained by each axis is given in parenthesis on bNM composition
